# Supplementary material
Source: PubMed Central journal article supplement (PMC9248336)

**FIGURE S3. ASSOCIATION BETWEEN PLACE OF BIRTH\*CALENDAR YEAR AND BODY MASS INDEX PERCENTILE FOR NYC LATINO PUBLIC SCHOOL STUDENTS IN GRADES K-12 (N<sub>OBSERVATIONS</sub>=3,103,642; N<sub>CHILDREN</sub>=809,418) ACROSS SEX, 2006/07-2016/17**

- Girls NYC
- Girls South America
- Girls Central America
- Girls Dominican Republic
- Girls Puerto Rican
- Girls Mexican
- Boys NYC
- Boys South America
- Boys Central America
- Boys Dominican Republic
- Boys Puerto Rican
- Boys Mexican

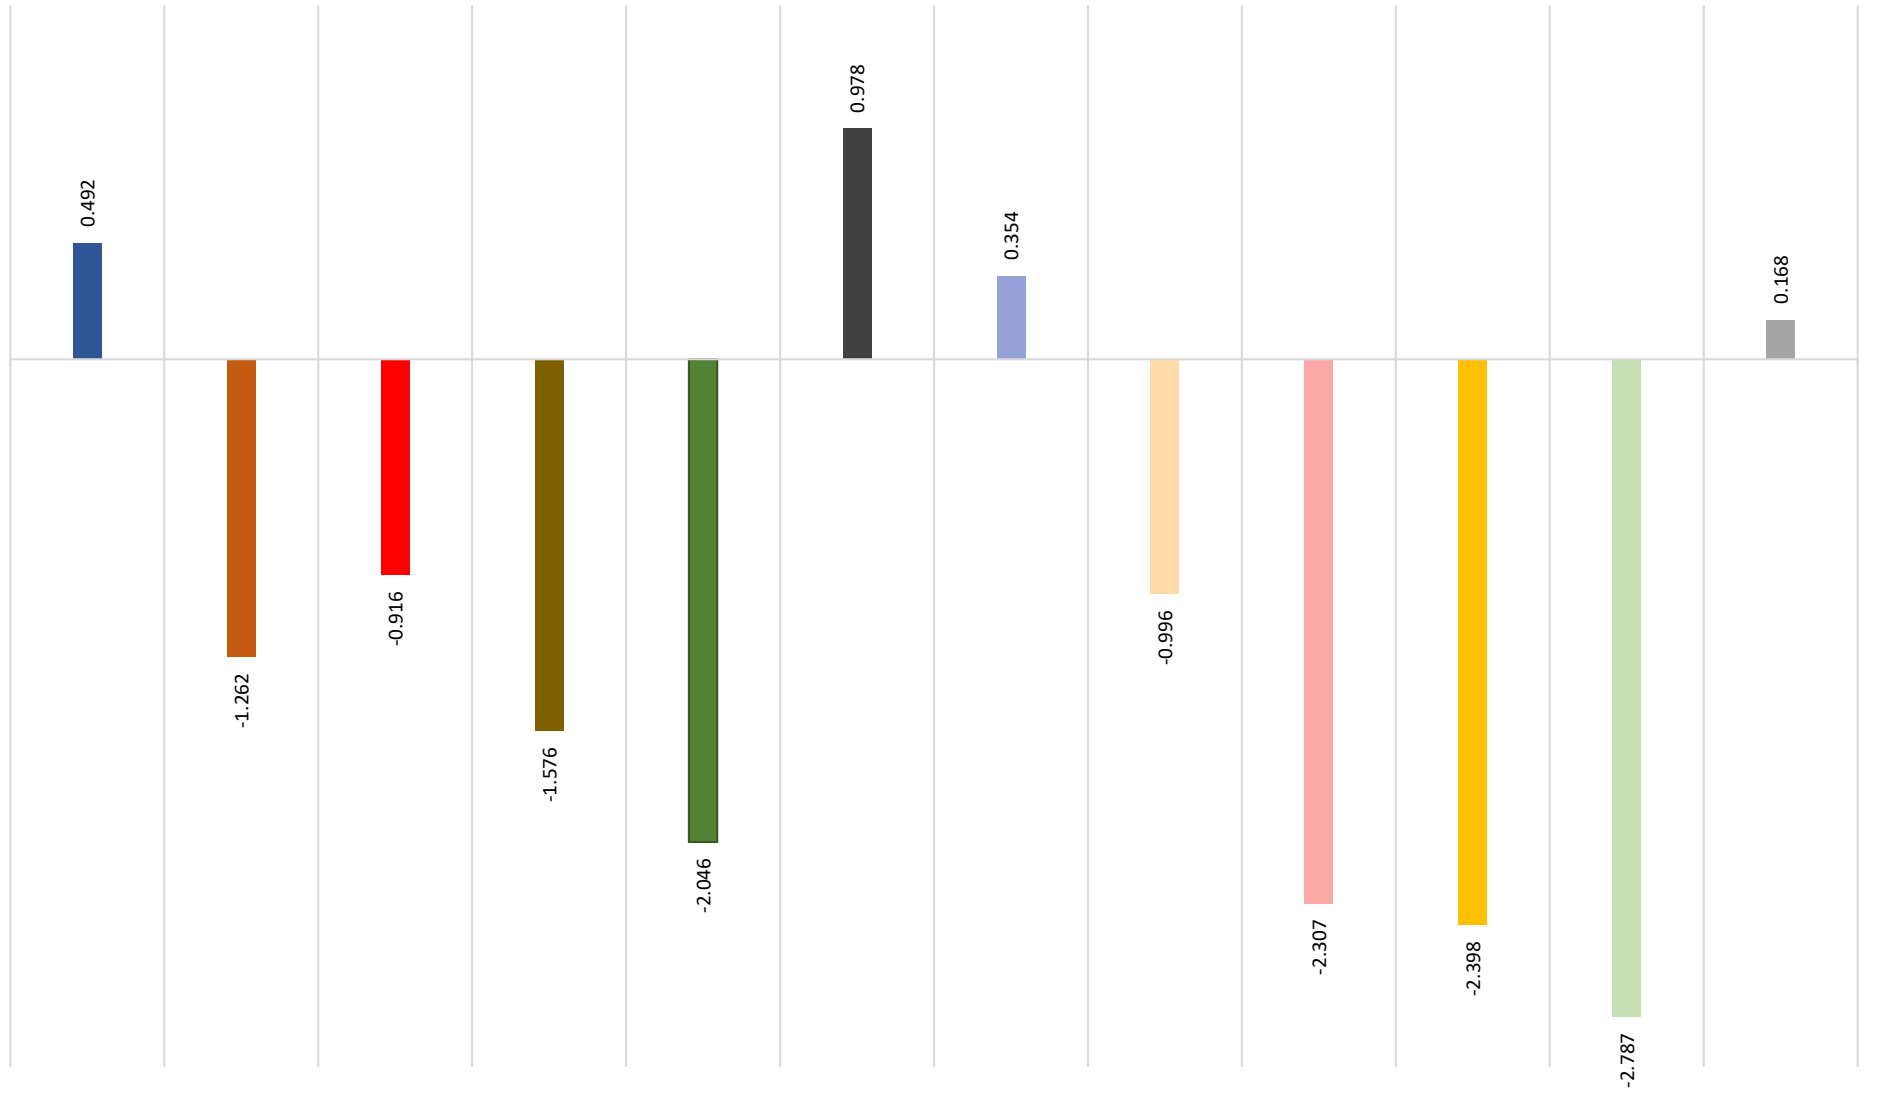

Supplement: Supp_FigS3.pdf [file Supp_FigS3.pdf]
